# Supplementary material
Source: HighWire-hosted journal article supplement (https://www.cmajopen.ca/highwire/filestream/84475/field_highwire_adjunct_files/0/2020-0076-1-at.pdf)
Supplement: 2020-0076-1-at.pdf [file 2020-0076-1-at.pdf]

**Appendix 1 (as supplied by the authors):** Ascertainment of known risk factors for opioid abuse in the 12 months prior to opioid initiation

| <b>Risk factor</b>                                     | <b>Method of ascertainment</b>                                                    |
|--------------------------------------------------------|-----------------------------------------------------------------------------------|
| Mood disorder                                          | ICD-9 <sup>1</sup> 296.x or 311.x, and at least one dispensing of antidepressants |
| Schizophrenia                                          | ICD-9 295 - 298.9                                                                 |
| Anxiety                                                | ICD-9 300.x, and at least one dispensing of benzodiazepine                        |
| Other psychiatric conditions                           | ICD-9 290 - 294.x, 301.x or 308 - 309.x                                           |
| Substance abuse, including alcohol dependence syndrome | ICD-9 303 - 305.9                                                                 |
| Dementia                                               | ICD-9 046.0, 290.x, 294.x, 331.0 - 331.2, 331.5, 331.8, 331.9                     |

**Reference**

1. World Health Organization. (1978). International classification of diseases : [9th] ninth revision, basic tabulation list with alphabetic index. World Health Organization. <https://apps.who.int/iris/handle/10665/39473> (accessed 07 August 2020)
